# Supplementary material for: Loss of mutual protection between human osteoclasts and chondrocytes in damaged joints initiates osteoclast-mediated cartilage degradation by MMPs
Source: PubMed Central journal article supplement (PMC8608887; doi:10.1038/s41598-021-02246-7), 2021-11-22
Supplement: 41598_2021_2246_MOESM1_ESM.pdf [file 41598_2021_2246_MOESM1_ESM.pdf]

Supplementary Information for:

**Loss of mutual protection between human osteoclasts and chondrocytes in damaged joints initiates osteoclast-mediated cartilage degradation by MMPs**

Quitterie C Larrouture<sup>1</sup>, Adam P Cribbs<sup>2</sup>, Srinivasa R Rao<sup>2,3</sup>, Martin Philpott<sup>2</sup>, Sarah J Snelling<sup>2</sup>, Helen J Knowles<sup>2\*</sup>

Affiliations: <sup>1</sup>Department of Pathology, University of Pittsburgh, Pittsburgh, USA. <sup>2</sup>Botnar Research Centre, Nuffield Department of Orthopaedics Rheumatology and Musculoskeletal Sciences, University of Oxford, UK. <sup>3</sup>Nuffield Department of Surgical Sciences, University of Oxford, Oxford, UK.

**Supplementary Table 1: RT-PCR primer sequences designed in-house.**

| <b>Gene name</b> | <b>Forward primer</b>   | <b>Reverse primer</b>  |
|------------------|-------------------------|------------------------|
| ACP5             | TGAGGACGTATTCTCTGACCG   | CACATTGGTCTGTGGGATCTTG |
| ATP6V1A 21S      | CCATCGGAACTACCATGCAGG   | TCCACAGAAGAGGTTAGACAGG |
| CA2              | GGACAAAGCAGCTTCACTTGG   | CCTAGAACGGCCAGTCCATC   |
| CLCN7            | CTAAGAAGGTGTCCTGGTCCG   | GGAGGGTCCATATCCTGGCG   |
| CTSK             | GCAGAAGAACCGGGTATTGA    | GAAGGAGGTCAGGCTTGCAT   |
| MMP2             | TACAGGATCATTGGCTACACACC | GGTCACATCGCTCCAGACT    |
| MMP7             | GAGTGAGCTACAGTGGGAACA   | CTATGACGCGGGAGTTTAACAT |
| MMP12            | AACCAACGCTTGCCAAATCC    | TTTCCCACGGTAGTGACAGC   |
| MMP14            | ATCTGCCTCTGCCTCACCTA    | AAGCCCCATCCAAGGCTAAC   |

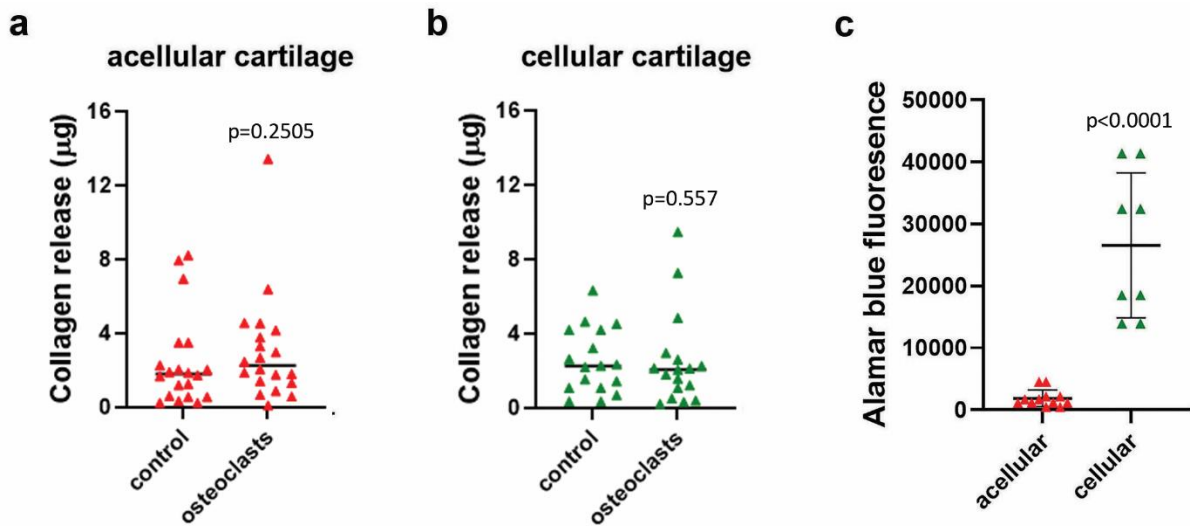

**Supplementary Figure 1: Substrate-dependent regulation of osteoclasts by chondrocytes.**

(a, b) Osteoclast-mediated release of collagen from (a) acellular (n=20; Mann-Whitney) or (b) cellular (n=17; Mann-Whitney) cartilage after 13 days of differentiation. (c) Alamar blue fluorescence of acellular and cellular cartilage on day 13 of culture (no osteoclasts, n=8; T test).

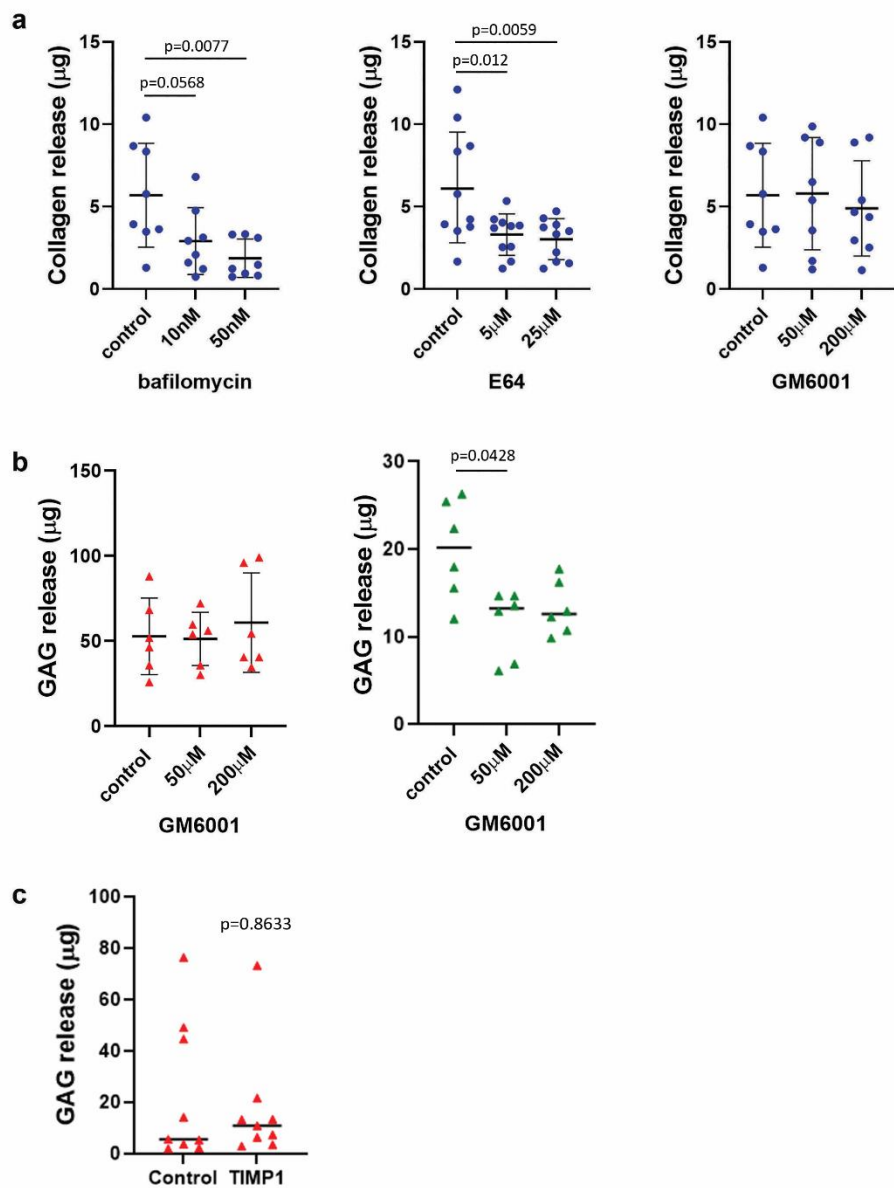

**Supplementary Figure 2: MMPs drive osteoclast-mediated degradation of cartilage. (a)**

Effect of bafilomycin (n=8), E64 (n=10) and GM6001 (n=8) on osteoclast-mediated release of collagen from dentine after 13 days of differentiation. All one-way ANOVA. (b) Effect of GM6001 on basal release of GAG from acellular (red; one-way ANOVA) and cellular (green; Kruskal-Wallis ANOVA) cartilage in the absence of osteoclasts, n=6. (c) Effect of recombinant human TIMP1 (100 nm) on basal release of GAG from acellular cartilage in the absence of osteoclasts (n=9; Mann-Whitney).

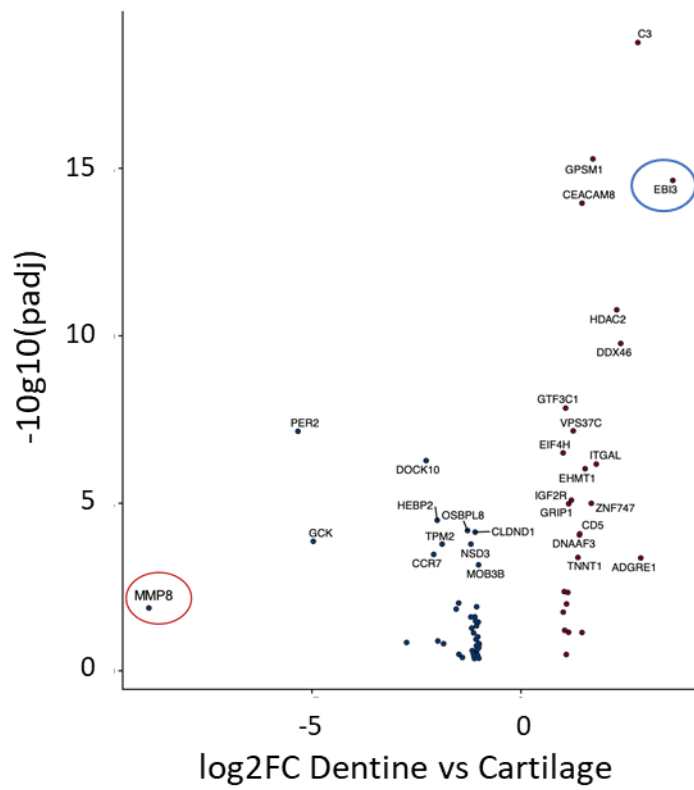

**Supplementary Figure 3: Volcano plot showing genes overexpressed in osteoclasts cultured on dentine versus cartilage.** Genes overexpressed on cartilage are on the left of the plot, those overexpressed on dentine are on the right. FC, fold change; padj, p value adjusted.

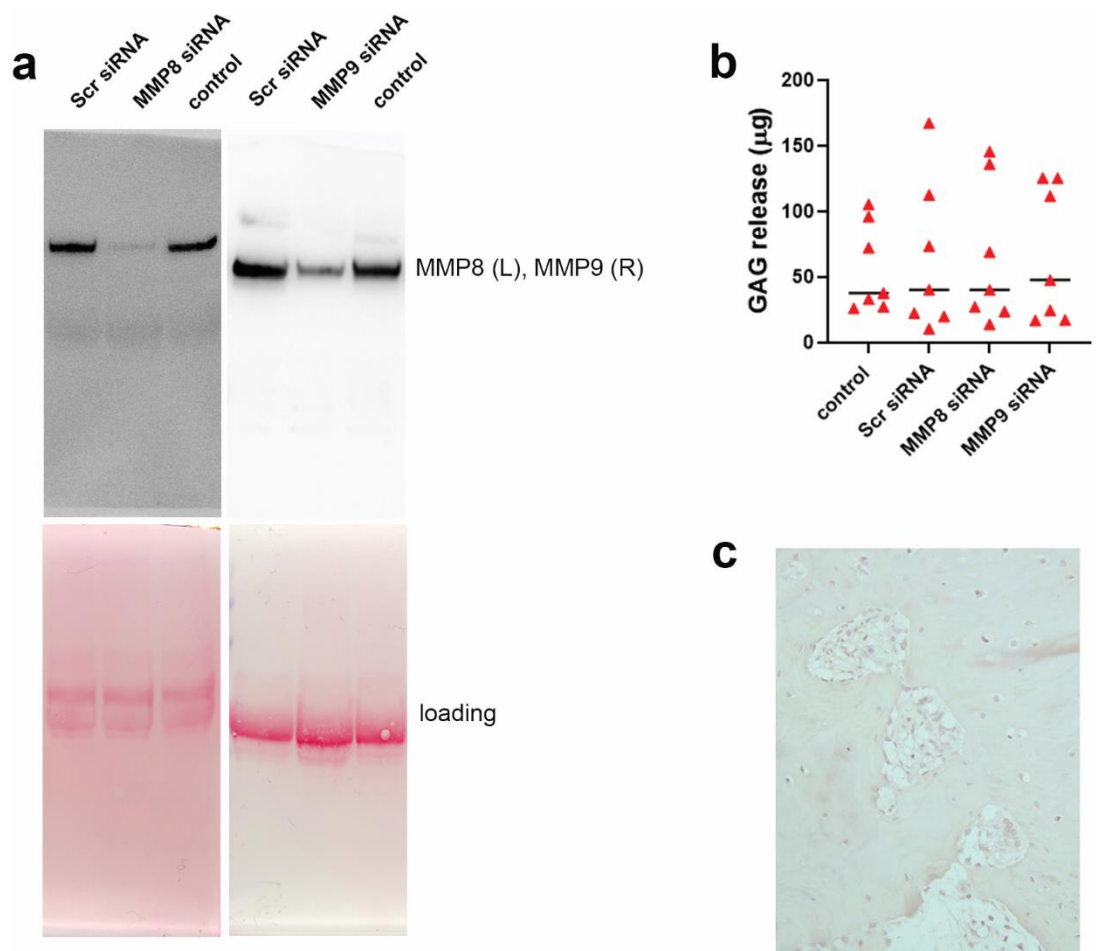

**Supplementary Figure 4: MMP8 and MMP9 are the primary MMPs responsible for osteoclast-mediated release of GAG from cartilage.** (a) Western blots showing MMP8 and MMP9 expression in osteoclasts following treatment with MMP8- or MMP9-siRNA or a scrambled siRNA control. Loading control = Ponceau staining. (b) Effect of MMP8 or MMP9 siRNA on basal release of GAG from acellular cartilage in the absence of osteoclasts (n=7; Kruskal-Wallis ANOVA). (c) IgG negative control immunohistochemistry of OA tissue section.
